# Supplementary material for: Analysis of Toll-Like Receptors in Human Milk: Detection of Membrane-Bound and Soluble Forms
Source: Hindawi journal article supplement (doi:10.1155/2019/4078671), 2019-12-04

## SUPPLEMENTARY MATERIAL

Table S1: list of proteins identified after mass spectrometry as TLRs or TLR-related proteins.

Table S1: list of proteins identified after mass spectrometry as TLRs or TLR-related proteins

| Protein name                          | Band name | Sample             | Donor type        | Theoretical MW | Observed MW | Uniprot ID | identified peptides                                                                                                                    | protein score |
|---------------------------------------|-----------|--------------------|-------------------|----------------|-------------|------------|----------------------------------------------------------------------------------------------------------------------------------------|---------------|
| TLR2                                  | B4        | Globules colostrum | healthy, pre-term | 87515          | 100000      | O60603     | LFDENNDAAIILILEPIEK<br>TLEILDVSNNNLNLFSNLPQLK                                                                                          | 127           |
| TLR2                                  | G2        | Globules colostrum | pre-term          | 87515          | 100000      | O60603     | SLDLSNNR<br>TGETLLTLK                                                                                                                  | 71            |
| TLR2                                  | B2        | Globules colostrum | term              | 87515          | 100000      | O60603     | GQQVQDVR                                                                                                                               | 47            |
| TLR2                                  | G11       | Globules mature    | term              | 87515          | 100000      | O60603     | SLDLSNNR<br>VGNMDTFTK + oxidation                                                                                                      | 87            |
| Monocyte differentiation antigen CD14 | B6        | Globules colostrum | term              | 40678          | 50000       | P08571     | ATVNPSAPR                                                                                                                              | 37            |
| Monocyte differentiation antigen CD14 | B11       | Globules mature    | term              | 40678          | 50000       | P08571     | ATVNPSAPR<br>AFPALTSLDLSDNPGLGER                                                                                                       | 41            |
| Monocyte differentiation antigen CD14 | B12       | Globules mature    | term              | 40678          | 45000       | P08571     | ATVNPSAPR                                                                                                                              | 64            |
| Monocyte differentiation antigen CD14 | G12       | Globules mature    | term              | 40678          | 75000       | P08571     | ATVNPSAPR                                                                                                                              | 32            |
| Monocyte differentiation antigen CD14 | G13       | Globules mature    | term              | 40678          | 50000       | P08571     | QYADTVK<br>ATVNPSAPR<br>VLDLSCNR<br>AFPALTSLDLSDNPGLGER                                                                                | 179           |
| CD36 Platelet glycoprotein 4          | G3        | Globules colostrum | term              | 53589          | 75000       | P16671     | TGTEVYR<br>SSMFQVR + oxidation<br>VAIIDTYK<br>QVVLEEGTIAFK<br>SQVLQFFSSDICR<br>TYLDIEPITGFTLQFAK<br>AFASPVENPDNYCFCTEK                 | 351           |
| CD36 Platelet glycoprotein 4          | G12       | Globules mature    | term              | 53589          | 75000       | P16671     | TGTEVYR<br>SSMFQVR + oxidation<br>VAIIDTYK<br>QVVLEEGTIAF<br>SIYAVFESDVNLK<br>SQVLQFFSSDICR<br>TYLDIEPITGFTLQFAK<br>AFASPVENPDNYCFCTEK | 503           |

|                                                                             |     |                    |          |        |       |          |                                                                                               |     |
|-----------------------------------------------------------------------------|-----|--------------------|----------|--------|-------|----------|-----------------------------------------------------------------------------------------------|-----|
| CD36 Isoform 2 of Platelet glycoprotein 4                                   | S1  | Skimmed colostrum  | term     | 32586  | 75000 | P16671-2 | TGTEVYR                                                                                       | 51  |
| CD36 Isoform 4 of Platelet glycoprotein 4                                   | B8  | Globules colostrum | pre-term | 46631  | 75000 | P16671-4 | SIYAVFESDVNLK<br>SIYAVFESDVNLK<br>SQVLQFFSSDICR<br>TYLDIEPITGFTLQFAK                          | 278 |
| CD36 Isoform 4 of Platelet glycoprotein 4                                   | G8  | Globules colostrum | term     | 46631  | 50000 | P16671-4 | VAIIDTYK<br>SIYAVFESDVNLK<br>SQVLQFFSSDICR                                                    | 118 |
| CD36 Isoform 4 of Platelet glycoprotein 4                                   | S2  | Skimmed colostrum  | pre-term | 46631  | 75000 | P16671-4 | QVVLEEGTIAFK<br>SIYAVFESDVNLK<br>SQVLQFFSSDICR<br>TYLDIEPITGFTLQFAK                           | 183 |
| Leucine-rich alpha-2-glycoprotein                                           | S5  | Skimmed colostrum  | term     | 38382  | 50000 | P02750   | CAGPEAVK<br>VAAGAFQGLR<br>ALGHLDLSGNNR<br>DLLLPQPDLR<br>ENQLEVLEVSWLHGLK<br>TLDLGENQLETLPDLLR | 339 |
| Isoform 2 of Leucine-rich repeats and immunoglobulin-like domains protein 1 | G7  | Globules colostrum | term     | 117958 | 75000 | Q96JA1-2 | LCAGSAYHK                                                                                     | 31  |
| Isoform 2 of Leucine-rich repeats and immunoglobulin-like domains protein 1 | G12 | Globules mature    | term     | 117958 | 75000 | Q96JA1-2 | LCAGSAYHK                                                                                     | 31  |
| Isoform 2 of Leucine-rich repeats and immunoglobulin-like domains protein 1 | S3  | Skimmed colostrum  | term     | 117958 | 75000 | Q96JA1-2 | LCAGSAYHK                                                                                     | 41  |
| Isoform 2 of Leucine-rich repeats and immunoglobulin-like domains protein 1 | S4  | Skimmed colostrum  | term     | 117958 | 66000 | Q96JA1-2 | LCAGSAYHK                                                                                     | 45  |
| isoform 2 of Tenascin                                                       | S3  | Skimmed colostrum  | term     | 196895 | 75000 | P24821-2 | SIPVSAR<br>FTTDLDSPR<br>LDAPSQIEVK<br>ETFTTGLDAPR<br>VPGDQTSTIIQELEPGVEYFIR                   | 193 |
| isoform 2 of Tenascin                                                       | S4  | Skimmed colostrum  | term     | 196895 | 66000 | P24821-2 | CVCEQGFK<br>CPSDCHGQGR<br>VPGDQTSTIIQELEPGVEYFIR                                              | 92  |

|                       |     |                    |      |        |        |          |                                                                                                                                                                                                       |     |
|-----------------------|-----|--------------------|------|--------|--------|----------|-------------------------------------------------------------------------------------------------------------------------------------------------------------------------------------------------------|-----|
| isoform 2 of Tenascin | S5  | Skimmed colostrum  | term | 196895 | 50000  | P24821-2 | AAIDSYR<br>SFSTFDK<br>AYAAGFGDR<br>IQALNGPLR<br>FTDLDSPR<br>APTAQVESFR<br>ITAQGQYELR<br>EEFWLGLDNLNK<br>DTDSAITNCALSYK<br>SNMIQTIFTTIGLLYPFPK<br>DLTATEVQSETALLTWRPPR<br>TVSGNTVEYALTDLEPATEYTLR      | 539 |
| isoform 2 of Tenascin | S6  | Skimmed colostrum  | term | 196895 | 37000  | P24821-2 | DLTATEVQSETALLTWRPPR                                                                                                                                                                                  | 34  |
| isoform 2 of Tenascin | S8  | Skimmed colostrum  | term | 196895 | 100000 | P24821-2 | SIPVSAR<br>AAIDSYR<br>AYAAGFGDR<br>CVCEQGFK<br>LDAPSQIEVK<br>ETFTTGLDAPR<br>YAPISGGDHAEVDVPK<br>GLEPGQEYNVLLTAEK<br>VPGDQTSTIIQELEPGVEYFIR<br>ETSVEVEWDPLDIAFETWEIIFR<br>DVTDTTALITWFKPLAEIDGIELTYGIK | 493 |
| isoform 2 of Tenascin | S10 | Skimmed colostrum  | term | 196895 | 25000  | P24821-2 | ITAQGQYELR<br>LEELENLVSSLR                                                                                                                                                                            | 86  |
| isoform 2 of Tenascin | B1  | Globules colostrum | term | 196895 | 150000 | P24821-2 | LSWTADEGVFDNFVLK                                                                                                                                                                                      | 60  |
| isoform 2 of Tenascin | B2  | Globules colostrum | term | 196895 | 100000 | P24821-2 | CVCEQGFK                                                                                                                                                                                              | 22  |
| isoform 2 of Tenascin | B6  | Globules colostrum | term | 196895 | 50000  | P24821-2 | FTDLDSPR                                                                                                                                                                                              | 45  |
| isoform 2 of Tenascin | B11 | Globules mature    | term | 196895 | 50000  | P24821-2 | TAHISGLPPSTDFIVYLSGLAPSIR                                                                                                                                                                             | 60  |
| isoform 2 of Tenascin | G12 | Globules mature    | term | 196895 | 75000  | P24821-2 | TVSGNTVEYALTDLEPATEYTLR<br>TAHISGLPPSTDFIVYLSGLAPSIR                                                                                                                                                  | 121 |
| isoform 4 of Tenascin | B12 | Globuli maturo     | term | 236365 | 45000  | P24821-4 | AGTPYVTTLHGEVR<br>AHISGLPPSTDFIVYLSGLAPSIR                                                                                                                                                            | 140 |
| isoform 4 of Tenascin | S1  | Skimmed colostrum  | term | 236365 | 75000  | P24821-4 | NLTVPGSLR<br>LDAPSQIEVK<br>LEELENLVSSLR                                                                                                                                                               | 46  |

|                           |    |                   |      |       |        |        |                                                                                                                                                                                                                                                       |     |
|---------------------------|----|-------------------|------|-------|--------|--------|-------------------------------------------------------------------------------------------------------------------------------------------------------------------------------------------------------------------------------------------------------|-----|
| Zinc-alpha-2-glycoprotein | S3 | Skimmed colostrum | term | 34465 | 75000  | P25311 | AGEVQEPELR                                                                                                                                                                                                                                            | 64  |
| Zinc-alpha-2-glycoprotein | S4 | Skimmed colostrum | term | 34465 | 66000  | P25311 | AYLEEECPATLR                                                                                                                                                                                                                                          | 61  |
| Zinc-alpha-2-glycoprotein | S5 | Skimmed colostrum | term | 34465 | 50000  | P25311 | AGEVQEPELR<br>YSLTYIYTGLSK<br>EIPAWVPFPDPAAQITK                                                                                                                                                                                                       | 134 |
| Zinc-alpha-2-glycoprotein | S6 | Skimmed colostrum | term | 34465 | 37000  | P25311 | QDSQLQK<br>SQPMGLWR + oxidation<br>AGEVQEPELR<br>FGCEIENNR<br>WEAEPVYVQR<br>YSLTYIYTGLSK<br>AYLEEECPATLR<br>QKWEAEPVYVQR<br>YYVDGKDYIEFNK<br>QDPPSVVVTSHQAPGEK<br>QDPPSVVVTSHQAPGEK<br>EIPAWVPFPDPAAQITK<br>QVEGMEDWKQDSQLQK<br>HVEDVPAFQALGSLNDLQFFR | 699 |
| Zinc-alpha-2-glycoprotein | S7 | Skimmed colostrum | term | 34465 | 25000  | P25311 | AGEVQEPELR                                                                                                                                                                                                                                            | 43  |
| Zinc-alpha-2-glycoprotein | S8 | Skimmed colostrum | term | 34465 | 100000 | P25311 | AGEVQEPELR<br>YSLTYIYTGLSK                                                                                                                                                                                                                            | 91  |
| Zinc-alpha-2-glycoprotein | S9 | Skimmed colostrum | term | 34465 | 30000  | P25311 | AGEVQEPELR<br>QDPPSVVVTSHQAPGEK<br>HVEDVPAFQALGSLNDLQFFR                                                                                                                                                                                              | 172 |

Figure S1: complete Western blot with anti TLR2 for MFGM colostrum

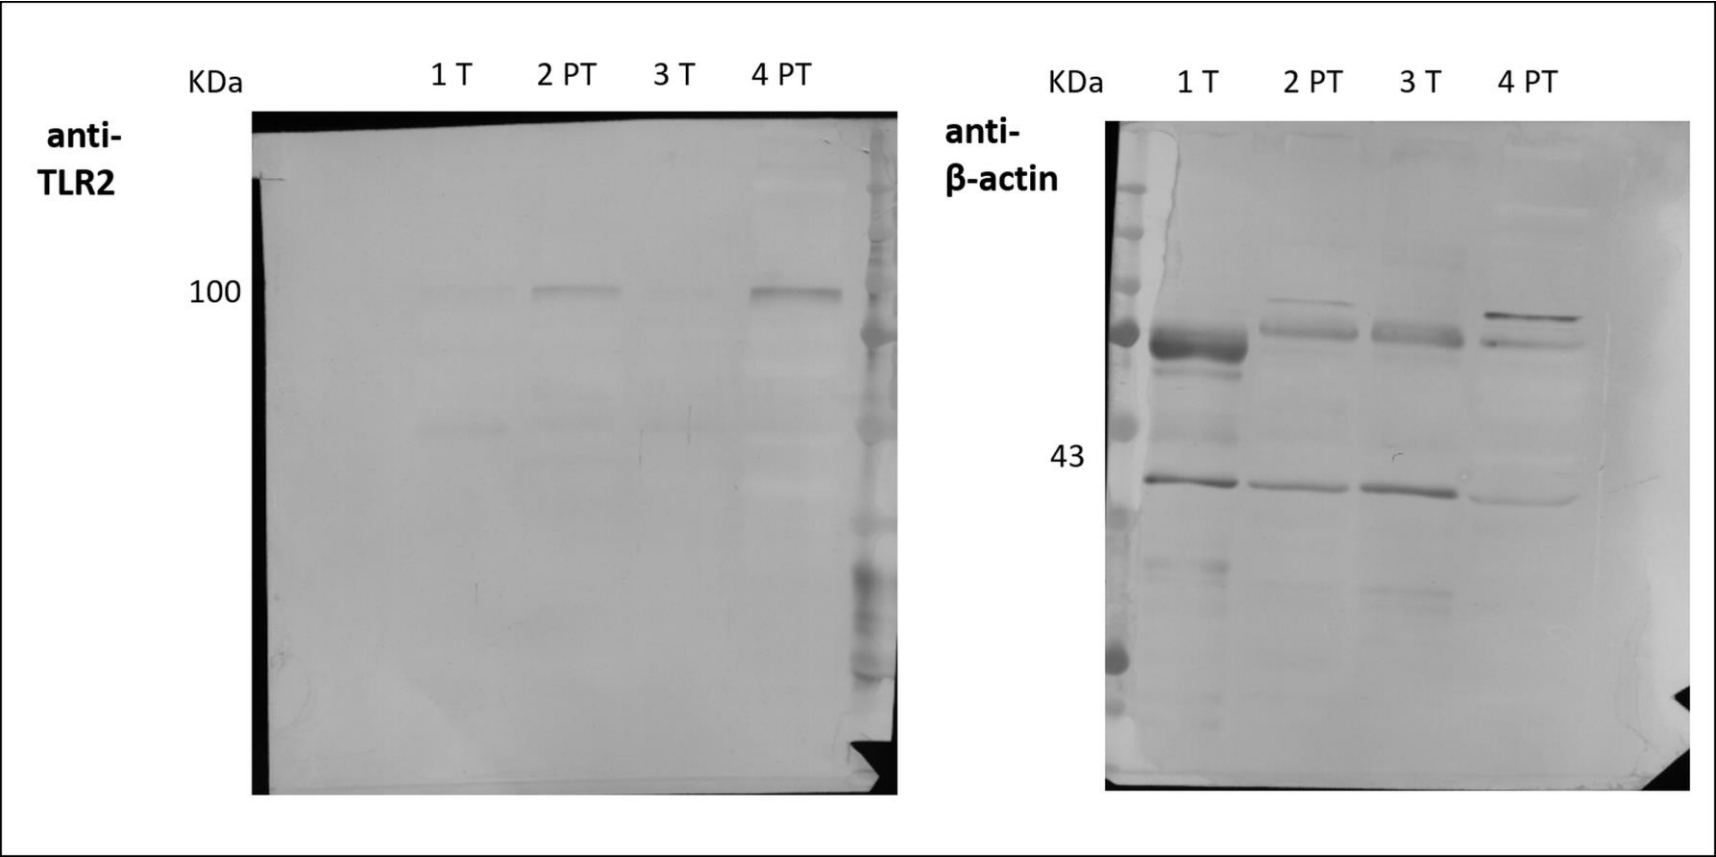

Figure S2: complete Western blot with anti TLR2 for MFGM mature milk

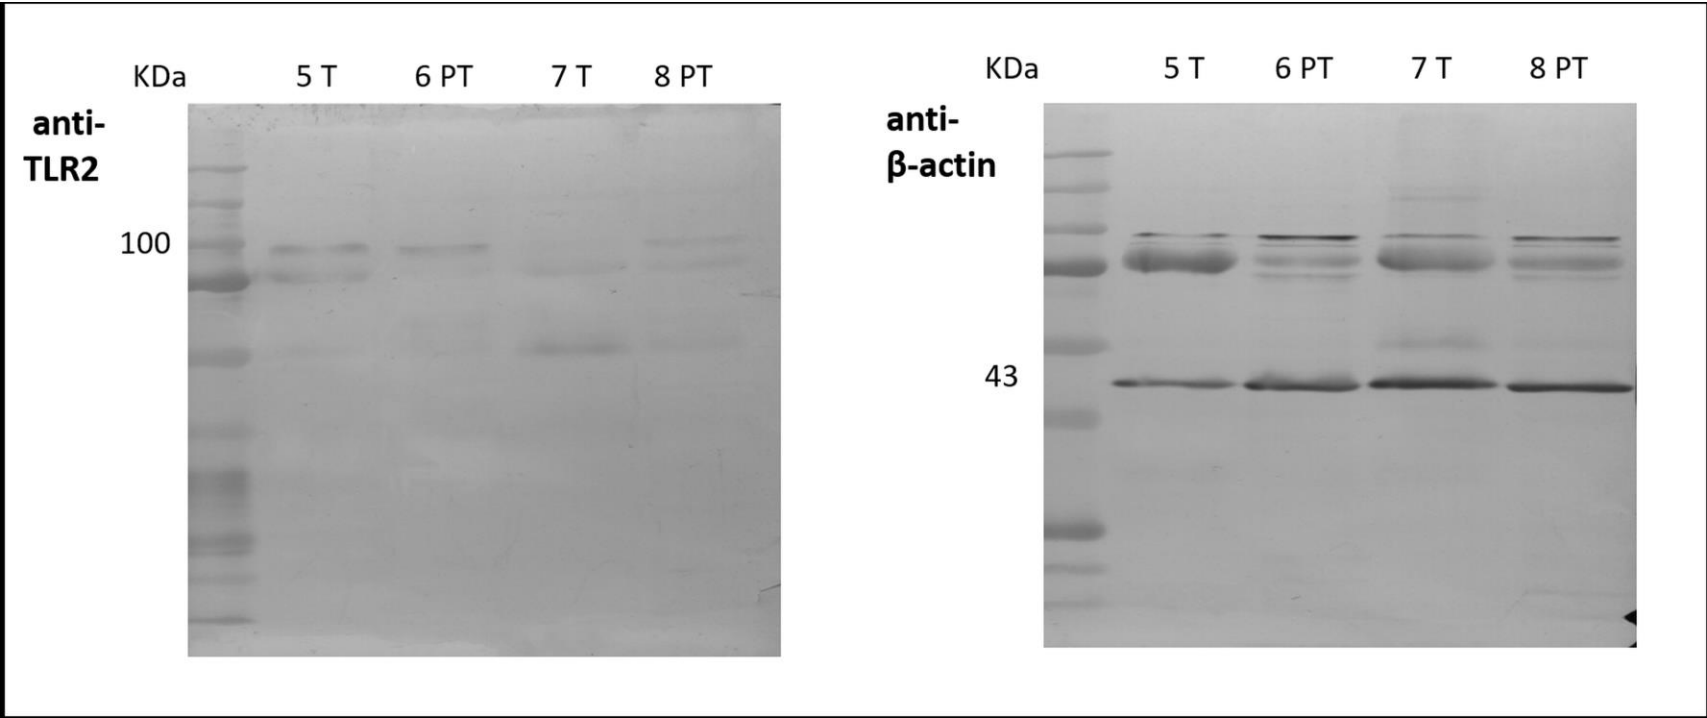

Figure S3: complete Western blot with anti TLR4 for MFGM colostrum

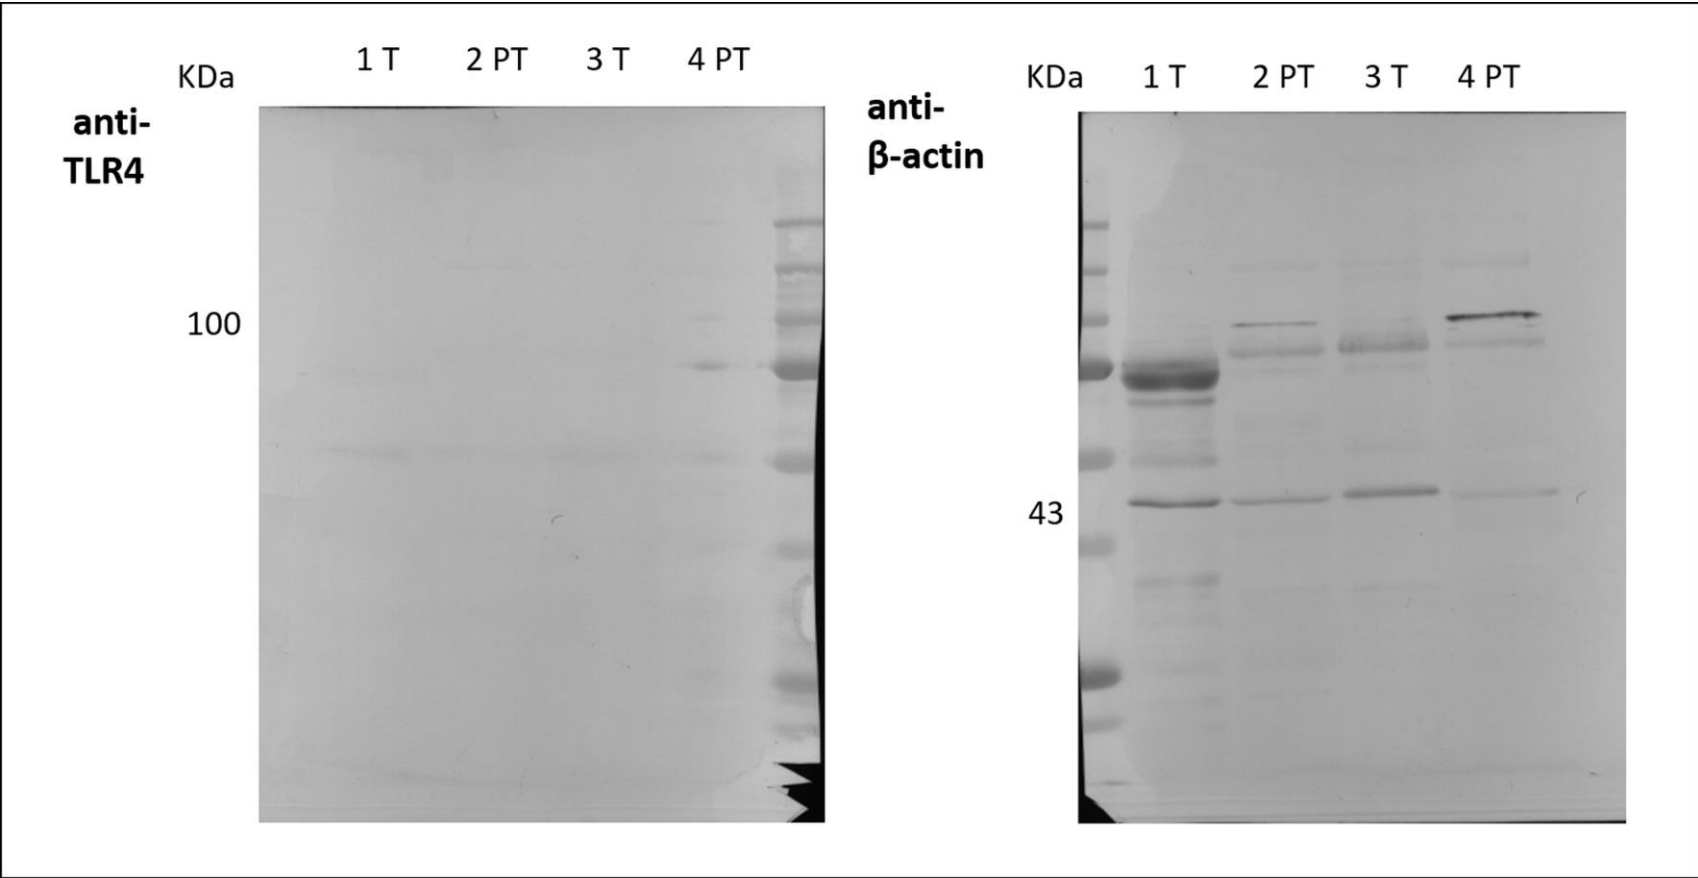

Figure S4: complete Western blot with anti TLR4 for MFGM mature milk

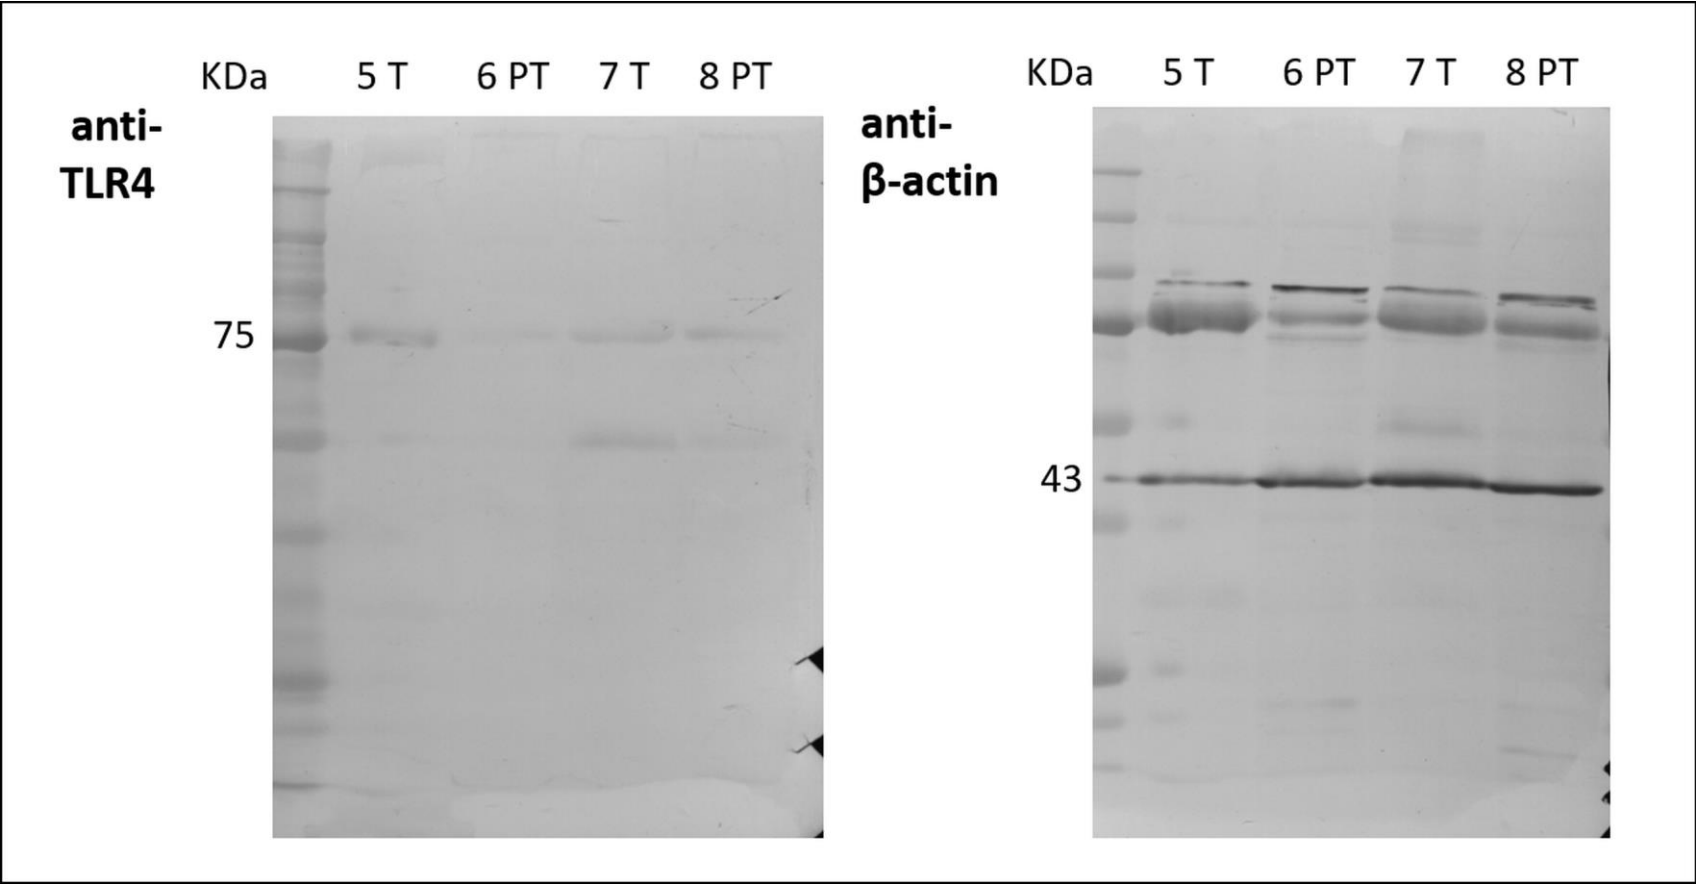



Figure S5: complete Western blot with anti TLR2 for Skimmed colostrum

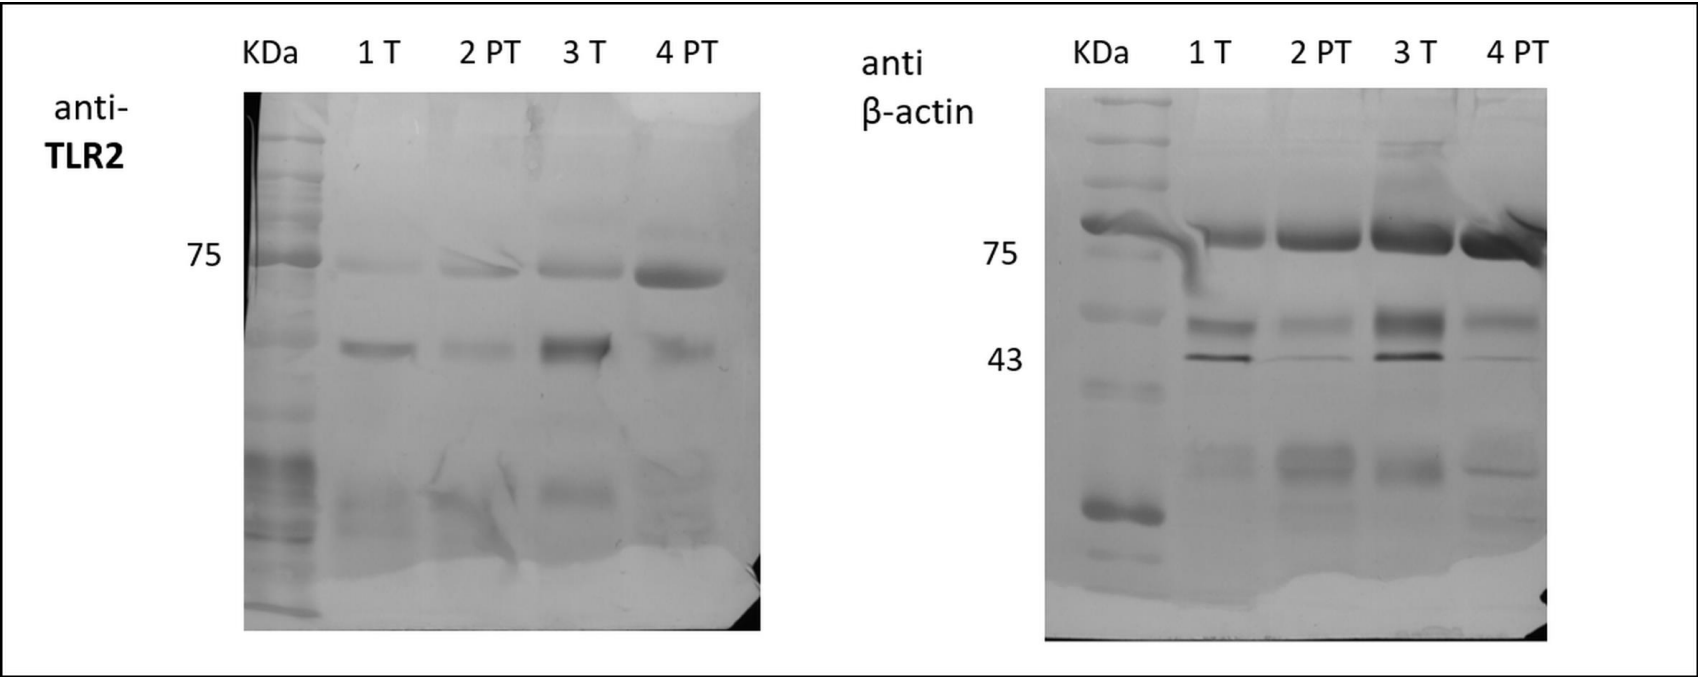

Figure S6: complete Western blot with anti TLR2 for Skimmed mature milk

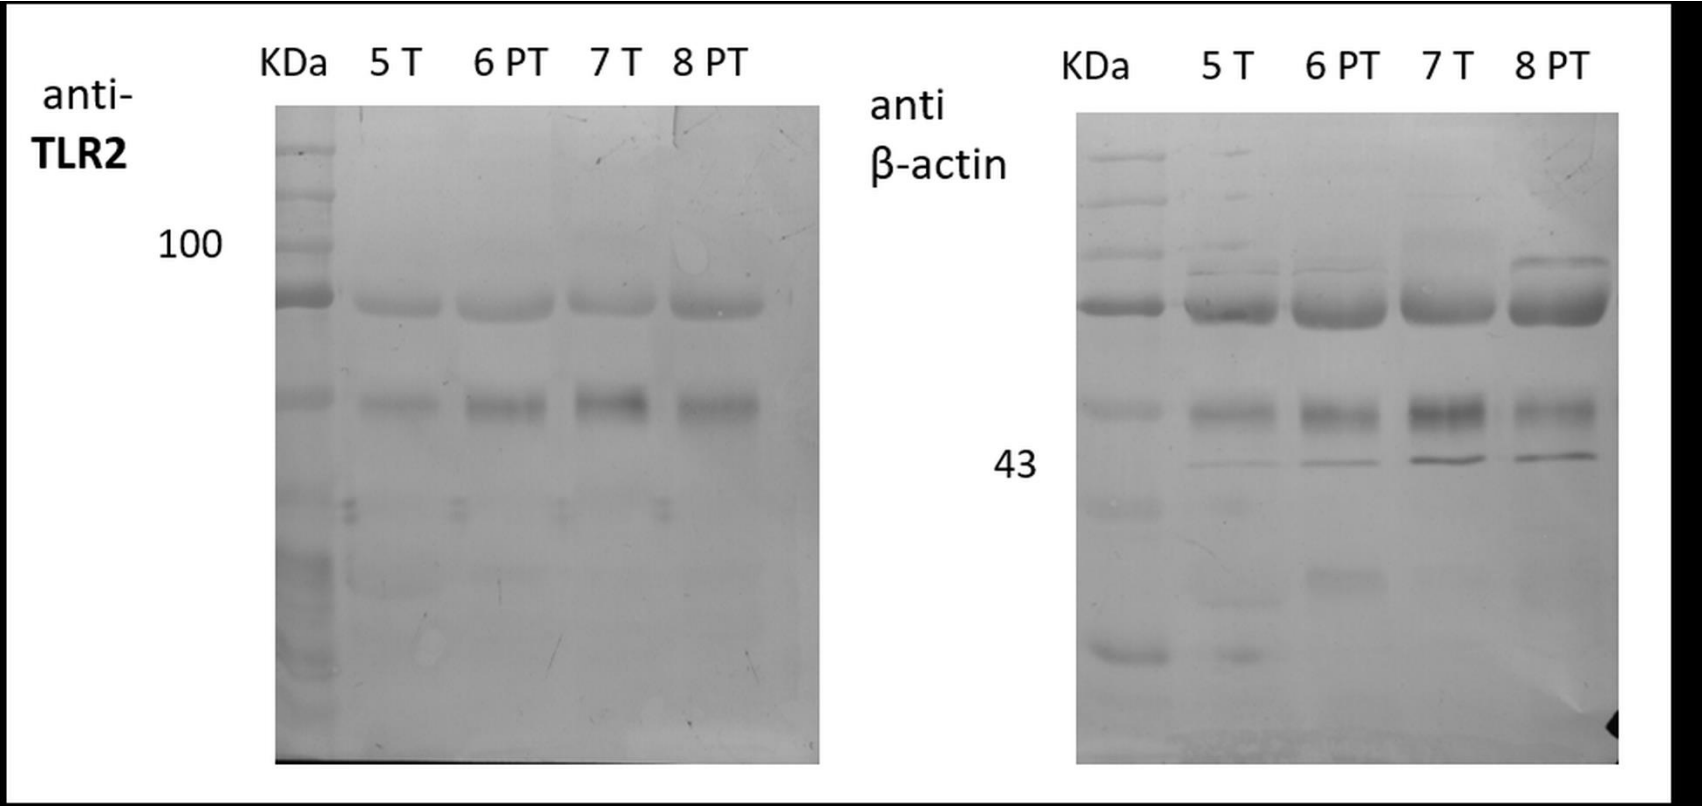

Figure S7: complete Western blot with anti TLR4 for Skimmed colostrum

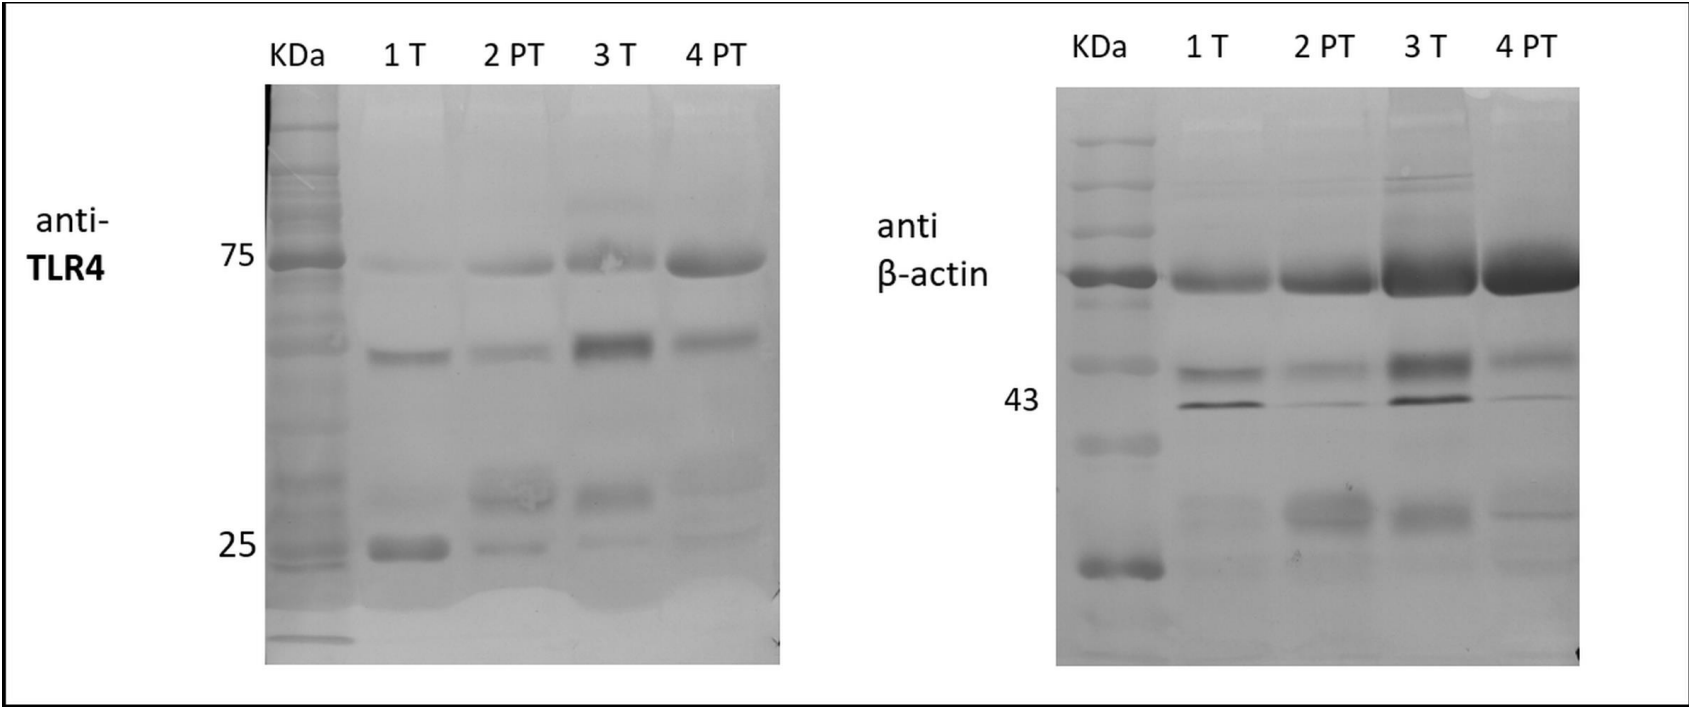

Figure S8: complete Western blot with anti TLR4 for Skimmed mature milk

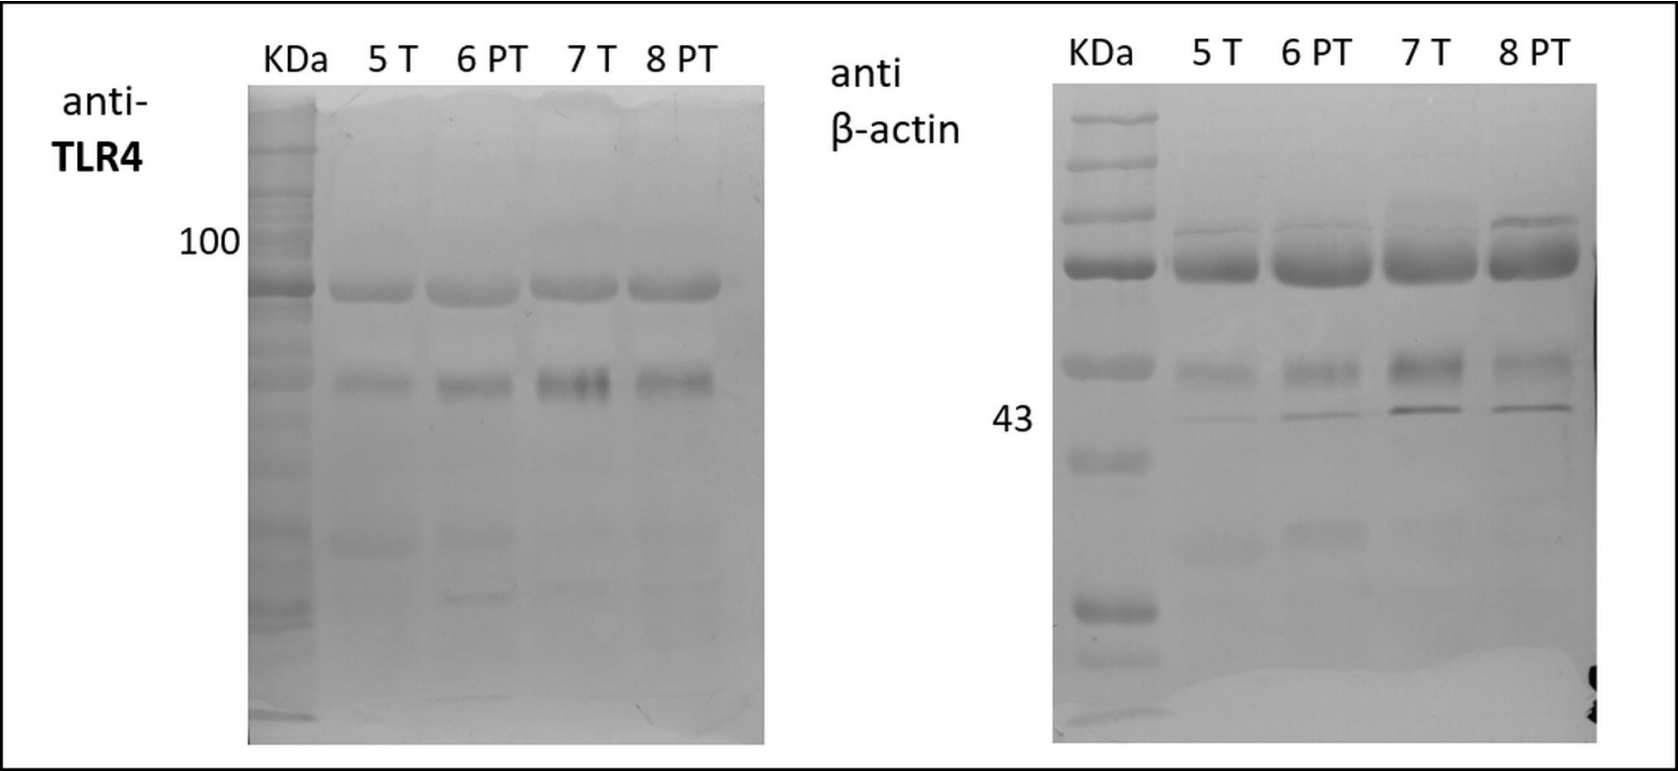

Supplement: f1 [file 4078671.f1.pdf]
